# Supplementary material for: Two Plastid Genome Sequences of the Belian (Eusideroxylon zwageri): Comparative Analysis and Phylogenetic Relationships with Other Magnoliids
Source: Preprints.org preprint supplement (doi:10.20944/preprints202311.0626.v1), 2023-11-09
Supplement: Supplementary file 1 [file supplementary]

## Sheet: 169078132712836_reportTable
####################################################################
Table 1. Gene composition in this chloroplast genome.
__________________________________________________________________________________
Category of genes		Group of genes		Name of genes
__________________________________________________________________________________
Genes for photosynthesis	Subunits of ATP synthase	atpA, atpB, atpE, atpF, atpH, atpI
Genes for photosynthesis	Subunits of photosystem II	psbA, psbB, psbC, psbD, psbE, psbF, psbI, psbJ, psbK, psbM, psbN, psbT, psbZ, ycf3
Genes for photosynthesis	Subunits of NADH-dehydrogenase	ndhA, ndhB, ndhB, ndhC, ndhD, ndhE, ndhF, ndhG, ndhH, ndhI, ndhJ, ndhK
Genes for photosynthesis	Subunits of cytochrome b/f complex	petA, petB, petD, petG, petN
Genes for photosynthesis	Subunits of photosystem I	psaA, psaB, psaC, psaI, psaJ
Genes for photosynthesis	Subunit of rubisco	rbcL
Self replication	Large subunit of ribosome	rpl14, rpl16, rpl20, rpl22, rpl23, rpl23, rpl32, rpl33, rpl36
Self replication	DNA dependent RNA polymerase	rpoA, rpoB, rpoC1, rpoC2
Self replication	Small subunit of ribosome	rps11, rps12, rps12, rps14, rps15, rps16, rps18, rps19, rps2, rps3, rps4, rps7, rps7, rps8
Other genes	Subunit of Acetyl-CoA-carboxylase	accD
Other genes	c-type cytochrom synthesis gene	ccsA
Other genes	Envelop membrane protein	cemA
Other genes	Protease	clpP
Other genes	Translational initiation factor	infA
Other genes	Maturase	matK
Unkown	Conserved open reading frames	ycf1, ycf2, ycf2, ycf4
__________________________________________________________________________________
####################################################################
Table 2. The lengths of introns and exons for the splitting genes.
__________________________________________________________________________________
Gene	Strand	Start	End	ExonI	IntronI	ExonII	IntronII	ExonIII
__________________________________________________________________________________
trnK-UUU	-	3362	5925	37	2492	35
rps16	-	6765	7827	43	802	218
trnG-UCC	-	11940	12799	48	788	24
atpF	-	14703	15969	145	712	410
rpoC1	-	23478	26241	432	712	1620
ycf3	-	45959	47916	124	729	230	716	159
trnL-UAG	+	50760	51332	35	488	50
trnV-UAC	-	55961	56621	39	587	35
clpP	-	74958	77007	71	800	294	641	244
petB	+	79896	81334	6	791	642
petD	+	81527	82728	8	719	475
rpl16	-	86175	87565	9	992	390
ndhB	-	98380	100560	721	702	758
trnI-GAU	+	106121	107141	37	949	35
trnA-UGC	+	107206	108080	38	802	35
ndhA	-	124244	126409	553	1074	539
trnA-UGC	-	138729	139603	38	802	35
trnI-GAU	-	139668	140688	37	949	35
ndhB	+	146249	148429	721	702	758
__________________________________________________________________________________
####################################################################
Table 3. Codon Usage in this chloroplast genome.
__________________________________________________________________________________
Codon	Amino acid	Frequency	Number
GCA	A	14.716	708
GCC	A	7.815	376
GCG	A	5.383	259
GCT	A	23.363	1124
TGC	C	3.409	164
TGT	C	8.688	418
GAC	D	9.042	435
GAT	D	33.298	1602
GAA	E	37.975	1827
GAG	E	14.737	709
TTC	F	24.568	1182
TTT	F	32.467	1562
GGA	G	25.4	1222
GGC	G	6.797	327
GGG	G	12.346	594
GGT	G	21.097	1015
CAC	H	6.423	309
CAT	H	20.141	969
ATA	I	25.358	1220
ATC	I	18.187	875
ATT	I	39.721	1911
AAA	K	37.102	1785
AAG	K	14.259	686
CTA	L	13.801	664
CTC	L	7.711	371
CTG	L	7.774	374
CTT	L	20.453	984
TTA	L	27.062	1302
TTG	L	23.446	1128
ATG	M	22.801	1097
AAC	N	11.515	554
AAT	N	35.002	1684
CCA	P	10.975	528
CCC	P	9.333	449
CCG	P	5.758	277
CCT	P	15.215	732
CAA	Q	26.189	1260
CAG	Q	9.956	479
AGA	R	19.081	918
AGG	R	8.813	424
CGA	R	13.427	646
CGC	R	3.388	163
CGG	R	5.072	244
CGT	R	13.49	649
AGC	S	4.885	235
AGT	S	16.025	771
TCA	S	16.732	805
TCC	S	14.155	681
TCG	S	9.249	445
TCT	S	21.305	1025
ACA	T	14.737	709
ACC	T	9.686	466
ACG	T	6.049	291
ACT	T	19.892	957
GTA	V	18.291	880
GTC	V	7.171	345
GTG	V	8.46	407
GTT	V	19.247	926
TGG	W	17.855	859
TAC	Y	8.397	404
TAT	Y	28.995	1395
TAA	*	2.473	119
TAG	*	1.725	83
TGA	*	2.12	102
__________________________________________________________________________________

## Sheet: 注释的基因
表1 坤甸铁樟叶绿体基因组所注释到的基因 Table 1. Genes annotated in the Eusideroxylon zwageri chloroplast genome
基因功能 Gene funcction	基因分组 Group of genes	基因名称 Name of genes	数量 Number
光合作用相关 Photosynthesis related	ATP 合成酶亚基 Subunits of ATP synthase	atpA, atpB, atpE, atpF*, atpH, atpI	6
	光系统Ⅱ亚基 Subunits of photosystem II	psbA, psbB, psbC, psbD, psbE, psbF, psbH, psbI, psbJ, psbK, psbM, psbN, psbT, psbZ, ycf3**	15
	NADH 质体醌氧化还原酶亚基 Subunits of NADH-dehydrogenase	ndhA*, ndhB* (2), ndhC, ndhD, ndhE, ndhF, ndhG, ndhH, ndhI, ndhJ, ndhK	12
	细胞色素 b/f 复合物亚基 Subunits of cytochrome b/f complex	petA, petB*, petD*, petG, petN	5
	光系统Ⅰ亚基 Subunits of photosystem I	psaA, psaB, psaC, psaI, psaJ	5
	核糖体亚基 Subunit of rubisco	rbcL	1
	rRNA 基因 Ribosomal RNA genes	rrn23 (2), rrn16 (2), rrn5 (2), rrn4.5 (2)	8
自我复制相关 Self-replication related	核糖体蛋白大亚基 Large subunit of ribosome	rpl14, rpl16*, rpl20, rpl22, rpl23 (2), rpl32, rpl33, rpl36	9
	RNA 聚合酶 DNA dependent RNA polymerase	rpoA, rpoB, rpoC1*, rpoC2	4
	核糖体蛋白小亚基 Small subunit of ribosome	rps2, rps3, rps4, rps7 (2), rps8, rps11, rps12 (2), rps14, rps15, rps16*, rps18, rps19	14
	tRNA基因 Transfer RNA genes	trnA-UGC**(2), trnC-GCA, trnD-GUC, trnE-UUC, trnF-GAA, trnG-GCC, trnG-UCC*, trnI-CAU(2), trnI-GAU*(2), trnK-UUU**, trnL-CAA(2), trnL-UAA, trnL-UAG*, trnM-CAU(2), trnN-GUU(2), trnP-UGG, trnQ-UUG, trnR-ACG(2), trnR-UCU, trnS-GCU, trnS-GGA, trnS-UGA, trnT-GGU, trnT-UGU, trnV-GAC(2), trnV-UAC*, trnW-CCA, trnY-GUA	36
其它基因 Other genes	乙酰辅酶 A 羧基转移酶亚基 Subunit of Acetyl-CoA-carboxylase	accD	1
	C 型细胞色素合成基因 c-type cytochrom synthesis gene	ccsA	1
	包膜蛋白 Envelop membrane protein	cemA	1
	蛋白酶 Protease	clpP**	1
	起始因子 Translational initiation factor	infA	1
	成熟酶 Maturase	matK	1
未知功能 Unkown function	保守开放阅读框 Conserved open reading frames	ycf1, ycf2 (2), ycf4	4
注:“*”表示该基因存在一个内含子; “**”表示该基因存在两个内含子, “(2)”表示该基因有2个拷贝数
Note: “*”means gene with one intron; “**”means gene with two introns; (2)means number of copies of multi-copy genes

## Sheet: Sheet1
Supplementary table S1. Genes present in the Belian chloroplast genome
Gene funcction	Group of genes	Name of genes
Photosynthesis gene	Photosystem I	psaA, psaB, psaC, psaI, psaJ
	Photosystem II	psbA, psbB, psbC, psbD, psbE, psbF, psbH, psbI, psbJ, psbK, psbL, psbM, psbN, psbT, psbZ, ycf3**
	Cytochrome b/f complex	petA, petB*, petD*, petG, petL, petN
	ATP synthase	atpA, atpB, atpE, atpF*, atpH, atpI
	NADH-dehydrogenase	ndhA*, ndhB* (2), ndhC, ndhD, ndhE, ndhF, ndhG, ndhH, ndhI, ndhJ, ndhK
	Rubisco Large subunit	rbcL
Self-replication gene	RNA polymerase	rpoA, rpoB, rpoC1*, rpoC2
	Ribosomal proteins (LSU)	rpl2*, rpl14, rpl16*, rpl20, rpl22, rpl23 (2), rpl32, rpl33, rpl36
	Ribosomal proteins (SSU)	rps2, rps3, rps4, rps7 (2), rps8, rps11, rps12 (2), rps14, rps15, rps16*, rps18, rps19
	Transfer RNAs	trnA-UGC**(2), trnC-GCA, trnD-GUC, trnE-UUC, trnF-GAA, trnG-GCC, trnG-UCC*, trnH-GUG, trnI-CAU(2), trnI-GAU*(2), trnK-UUU**, trnL-CAA(2), trnL-UAA, trnL-UAG*, trnM-CAU(2), trnN-GUU(2), trnP-UGG, trnQ-UUG, trnR-ACG(2), trnR-UCU, trnS-GCU, trnS-GGA, trnS-UGA, trnT-GGU, trnT-UGU, trnV-GAC(2), trnV-UAC*, trnW-CCA, trnY-GUA
	Ribosomal RNAs	rrn4.5(2), rrn5(2), rrn16(2), rrn23(2)
Other genes	Subunit of Acetyl-CoA-carboxylase	accD
	C-type cytochrom synthesis gene	ccsA
	Envelop membrane protein	cemA
	Protease	clpP**
	Translational initiation factor	infA
	Maturase	matK
Functions unknown	Hypothetical chloroplast reading frames (ycf)	ycf1(2), ycf2(2), ycf4
Note: “*” means gene with one intron; “**” means gene with two introns; (2) means number of copies of multi-copy genes
