# Supplementary material for: Two Plastid Genome Sequences of the Belian (Eusideroxylon zwageri): Comparative Analysis and Phylogenetic Relationships with Other Magnoliids
Source: Preprints.org preprint supplement (doi:10.20944/preprints202311.0626.v1), 2023-11-09
Supplement: Supplementary file 2 [file Supplementary table S1.docx]

**Supplementary table S1.** Genes present in the Belian chloroplast genome
