# Supplementary material for: Two Plastid Genome Sequences of the Belian (Eusideroxylon zwageri): Comparative Analysis and Phylogenetic Relationships with Other Magnoliids
Source: Preprints.org preprint supplement (doi:10.20944/preprints202311.0626.v1), 2023-11-09
Supplement: Supplementary file 5 [file Supplementary table S2.xlsx]

## Sheet: Sheet1
Supplementary table S2. Mutation present in the Belian chloroplast genome
Min (original sequence)	Length	Change	Polymorphism Type	Amino Acid Change	CDS	CDS Position	Codon Change	gene
502	1	C -> A	SNP (transversion)
791	1	A -> G	SNP (transition)
1538	1	(T)10 -> (T)9	Deletion (tandem repeat)
1538	0	(T)10 -> (T)11	Insertion (tandem repeat)
1779	5	AAATG	Deletion
3449	1	C -> A	SNP (transversion)
4000	1	C -> T	SNP (transition)	D -> N	matK CDS	1183	GAT -> AAT	matK
4334	1	G -> T	SNP (transversion)		matK CDS	849	TCC -> TCA	matK
5554	1	C -> A	SNP (transversion)
5998	1	A -> C	SNP (transversion)
6176	1	G -> T	SNP (transversion)
6177	1	G -> T	SNP (transversion)
6197	1	(T)10 -> (T)9	Deletion (tandem repeat)
7007	1	A -> G	SNP (transition)
7148	1	(A)10 -> (A)9	Deletion (tandem repeat)
7242	1	-C	Deletion
7398	1	A -> G	SNP (transition)
7825	1	C -> T	SNP (transition)	V -> I	rps16 CDS	4	GTA -> ATA	rps16
8666	0	CACAG	Insertion
8812	1	C -> A	SNP (transversion)
9731	1	C -> A	SNP (transversion)
11378	1	G -> C	SNP (transversion)
12100	1	A -> C	SNP (transversion)
13416	1	T -> C	SNP (transition)		atpA CDS	1224	CAA -> CAG	atpA
16067	15	TTAATATGAATTTCC	Deletion(tandem repeat)
16074	1	G -> T	SNP (transversion)
17259	1	T -> C	SNP (transition)
17917	1	C -> A	SNP (transversion)	V -> F	atpI CDS	133	GTT -> TTT	atpI
18360	1	C -> G	SNP (transversion)		rps2 CDS	618	GCG -> GCC	rps2
19001	0	(T)10 -> (T)11	Insertion (tandem repeat)
19668	1	T -> C	SNP (transition)	I -> V	rpoC2 CDS	3661	ATT -> GTT	rpoC2
22029	1	G -> T	SNP (transversion)	H -> N	rpoC2 CDS	1300	CAT -> AAT	rpoC2
25375	1	T -> G	SNP (transversion)
25385	1	C -> T	SNP (transition)
25596	1	(T)10 -> (T)9	Deletion (tandem repeat)
26245	0	ATAGAA	Insertion
26423	1	T -> C	SNP (transition)		rpoB CDS	3057	GGA -> GGG	rpoB
27194	1	T -> G	SNP (transversion)		rpoB CDS	2286	GGA -> GGC	rpoB
29960	0	GATAT	Insertion
30399	1	G -> T	SNP (transversion)
31241	1	A -> G	SNP (transition)
31874	1	T -> G	SNP (transversion)
31898	0	TTCATAAA	Insertion
32123	1	C -> G	SNP (transversion)
32490	1	A -> C	SNP (transversion)
32852	1	A -> C	SNP (transversion)
32853	1	A -> C	SNP (transversion)
32910	1	C -> T	SNP (transition)
33016	1	(A)7 -> (A)6	Deletion (tandem repeat)
33339	1	T -> C	SNP (transition)
34139	0	(CTATG)2 -> (CTATG)3	Insertion (tandem repeat)
34429	0	(T)9 -> (T)10	Insertion (tandem repeat)
35272	1	A -> G	SNP (transition)
35299	1	G -> A	SNP (transition)
35551	1	A -> G	SNP (transition)
38690	1	T -> C	SNP (transition)		psbC CDS	1287	TCT -> TCC	psbC
38966	7	TCCCACC -> GGTGGGA	Microinversion					psbC-trnS
39389	0	TTTCAATTT	Insertion
40086	1	C -> A	SNP (transversion)
44049	1	A -> G	SNP (transition)		psaA CDS	1254	ACT -> ACC	psaA
44374	1	C -> T	SNP (transition)	R -> K	psaA CDS	929	AGG -> AAG	psaA
44382	1	A -> G	SNP (transition)		psaA CDS	921	CAT -> CAC	psaA
45273	1	T -> G	SNP (transversion)		psaA CDS	30	GTA -> GTC	psaA
47188	1	T -> G	SNP (transversion)
47389	1	G -> A	SNP (transition)
48103	1	A -> G	SNP (transition)
48996	1	(A)8 -> (A)7	Deletion (tandem repeat)
48996	0	(A)8 -> (A)9	Insertion (tandem repeat)
49907	1	G -> A	SNP (transition)
50215	5	AACTT	Deletion
50220	0	(A)2 -> (A)3	Insertion (tandem repeat)
50392	0	(A)9 -> (A)10	Insertion (tandem repeat)
51498	1	A -> G	SNP (transition)
51894	1	G -> A	SNP (transition)
51983	1	G -> T	SNP (transversion)
52914	0	TATGGATAT	Insertion
53683	1	(T)12 -> (T)11	Deletion (tandem repeat)
53683	0	(T)12 -> (T)13	Insertion (tandem repeat)
53790	1	T -> G	SNP (transversion)	L -> F	ndhC CDS	294	TTA -> TTC	ndhC
54302	1	A -> C	SNP (transversion)
54410	1	T -> G	SNP (transversion)
55159	1	A -> T	SNP (transversion)
55394	1	G -> A	SNP (transition)
56881	1	T -> C	SNP (transition)
56883	1	T -> AC	Insertion
56954	1	(T)10 -> (T)9	Deletion (tandem repeat)
57060	1	C -> A	SNP (transversion)		atpE CDS	399	TCG -> TCT	atpE
57671	1	C -> A	SNP (transversion)	M -> I	atpB CDS	1281	ATG -> ATT	atpB
59330	1	A -> C	SNP (transversion)
59460	1	A -> G	SNP (transition)
59528	10	GATGTATTTG	Deletion
60135	1	G -> T	SNP (transversion)		rbcL CDS	414	CTG -> CTT	rbcL
60417	1	G -> A	SNP (transition)		rbcL CDS	696	ACG -> ACA	rbcL
61296	1	C -> A	SNP (transversion)
61692	0	TTTCT	Insertion
61713	0	TATTAG	Insertion
62177	1	G -> A	SNP (transition)	S -> N	accD CDS	338	AGT -> AAT	accD
62360	1	C -> ACATTTATAGTTA	Insertion	P -> HIYSY	accD CDS	521	CCC -> CAC,ATT,TAT,AGT,TAC	accD
63603	1	A -> T	SNP (transversion)
63850	1	A -> G	SNP (transition)
64888	1	C -> G	SNP (transversion)	P -> R	ycf4 CDS	458	CCC -> CGC	ycf4
65302	1	A -> C	SNP (transversion)
66074	1	A -> G	SNP (transition)		cemA CDS	177	AGA -> AGG	cemA
68310	1	A -> G	SNP (transition)
68311	0	(G)8 -> (G)9	Insertion (tandem repeat)
68544	1	G -> A	SNP (transition)
68852	12	GAATCAGACAAA -> TTTGTCTGATTC	Microinversion					petA-psbJ
70567	1	(A)10 -> (A)9	Deletion (tandem repeat)
71578	5	CCGAT	Deletion
72527	1	C -> A	SNP (transversion)
72861	1	G -> A	SNP (transition)		rpl33 CDS	189	GAG -> GAA	rpl33
73321	1	A -> C	SNP (transversion)
75509	1	(T)13 -> (T)12	Deletion (tandem repeat)
75510	1	(T)13 -> (T)12	Deletion (tandem repeat)
75672	1	(A)9 -> (A)8	Deletion (tandem repeat)
76659	1	G -> A	SNP (transition)
77290	1	A -> C	SNP (transversion)
77647	1	A -> G	SNP (transition)	E -> G	psbB CDS	248	GAA -> GGA	psbB
79116	1	G -> A	SNP (transition)	A -> T	psbT CDS	7	GCA -> ACA	psbT
79731	1	G -> A	SNP (transition)	S -> N	psbH CDS	218	AGT -> AAT	psbH
80042	1	C -> A	SNP (transversion)
80477	1	C -> T	SNP (transition)
82038	1	C -> A	SNP (transversion)
84749	1	T -> G	SNP (transversion)		infA CDS	183	TCA -> TCC	infA
85919	1	C -> A	SNP (transversion)	R -> L	rpl14 CDS	92	CGA -> CTA	rpl14
86177	2	GA -> TC	Microinversion	S -> E	rpl16 CDS	355	TCA -> GAA	rpl16
87465	1	(T)14 -> (T)13	Deletion (tandem repeat)
87593	0	(TT)7 -> (TT)8	Insertion (tandem repeat)
87593	0	(T)14 -> (T)15	Insertion (tandem repeat)
88786	1	C -> T	SNP (transition)	R -> K	rpl22 CDS	8	AGG -> AAG	rpl22
91078	6	ATCGAT	Deletion	RSI -> S	ycf2 CDS	1275	AGA,TCG,ATT -> AGT	ycf2
92734	1	T -> G	SNP (transversion)	D -> E	ycf2 CDS	2931	GAT -> GAG	ycf2
93606	1	C -> A	SNP (transversion)	P -> Q	ycf2 CDS	3803	CCA -> CAA	ycf2
95656	1	C -> A	SNP (transversion)	F -> L	ycf2 CDS	5853	TTC -> TTA	ycf2
96970	5	AAGAC	Deletion
114060	1	C -> A	SNP (transversion)	L -> F	ndhF CDS	2220	TTG -> TTT	ndhF
114074	1	T -> G	SNP (transversion)	I -> L	ndhF CDS	2206	ATA -> CTA	ndhF
115152	1	A -> C	SNP (transversion)	D -> E	ndhF CDS	1128	GAT -> GAG	ndhF
116340	1	T -> C	SNP (transition)
116376	1	G -> T	SNP (transversion)
116395	1	A -> C	SNP (transversion)
116440	1	(A)11 -> (A)10	Deletion (tandem repeat)
117212	2	(AA)5 -> (AA)4	Deletion (tandem repeat)
117212	0	(A)10 -> (A)11	Insertion (tandem repeat)
117337	1	C -> T	SNP (transition)
117731	3	TTC -> GAA	Microinversion					rrn5S-trnR
117768	0	(T)10 -> (T)11	Insertion (tandem repeat)
118156	1	C -> T	SNP (transition)
118175	1	G -> T	SNP (transversion)
118447	1	(A)14 -> (A)13	Deletion (tandem repeat)
118448	1	(A)14 -> (A)13	Deletion (tandem repeat)
118556	0	ATGAC	Insertion
119104	1	C -> A	SNP (transversion)	F -> L	ccsA CDS	225	TTC -> TTA	ccsA
119884	5	CTACT -> AGTAG	Microinversion					ccsA-ndhD
121968	1	T -> G	SNP (transversion)
123325	0	(T)9 -> (T)10	Insertion (tandem repeat)
125016	1	G -> T	SNP (transversion)
125508	0	T	Insertion
125912	1	C -> T	SNP (transition)		ndhA CDS	456	TCG -> TCA	ndhA
127851	1	T -> C	SNP (transition)	I -> V	rps15 CDS	70	ATA -> GTA	rps15
128484	1	G -> T	SNP (transversion)	P -> Q	ycf1 CDS	4700	CCA -> CAA	ycf1
129296	3	AAA -> TTT	Microinversion	F -> K	ycf1 CDS	3886	TTT -> AAA	ycf1
129657	1	G -> C	SNP (transversion)	T -> R	ycf1 CDS	3527	ACA -> AGA	ycf1
132180	1	C -> T	SNP (transition)	S -> N	ycf1 CDS	1004	AGT -> AAT	ycf1
132644	1	T -> C	SNP (transition)	I -> M	ycf1 CDS	540	ATA -> ATG	ycf1
149751	5	GTCTT	Deletion
151069	1	G -> T	SNP (transversion)	F -> L	ycf2 CDS	5853	TTC -> TTA	ycf2
153119	1	G -> T	SNP (transversion)	P -> Q	ycf2 CDS	3803	CCA -> CAA	ycf2
153991	1	A -> C	SNP (transversion)	D -> E	ycf2 CDS	2931	GAT -> GAG	ycf2
155642	6	ATCGAT	Deletion	RSI -> S	ycf2 CDS	1275	AGA,TCG,ATT -> AGT	ycf2
